# Supplementary material for: Nonlocal effects on the structural transition of gold clusters from planar to three-dimensional geometries
Source: Royal Society of Chemistry journal article supplement (doi:10.1039/c9ra02202c), 2019-01-01
Supplement: c9ra02202c1.pdf [file c9ra02202c1.pdf]

## Supplemental Materials

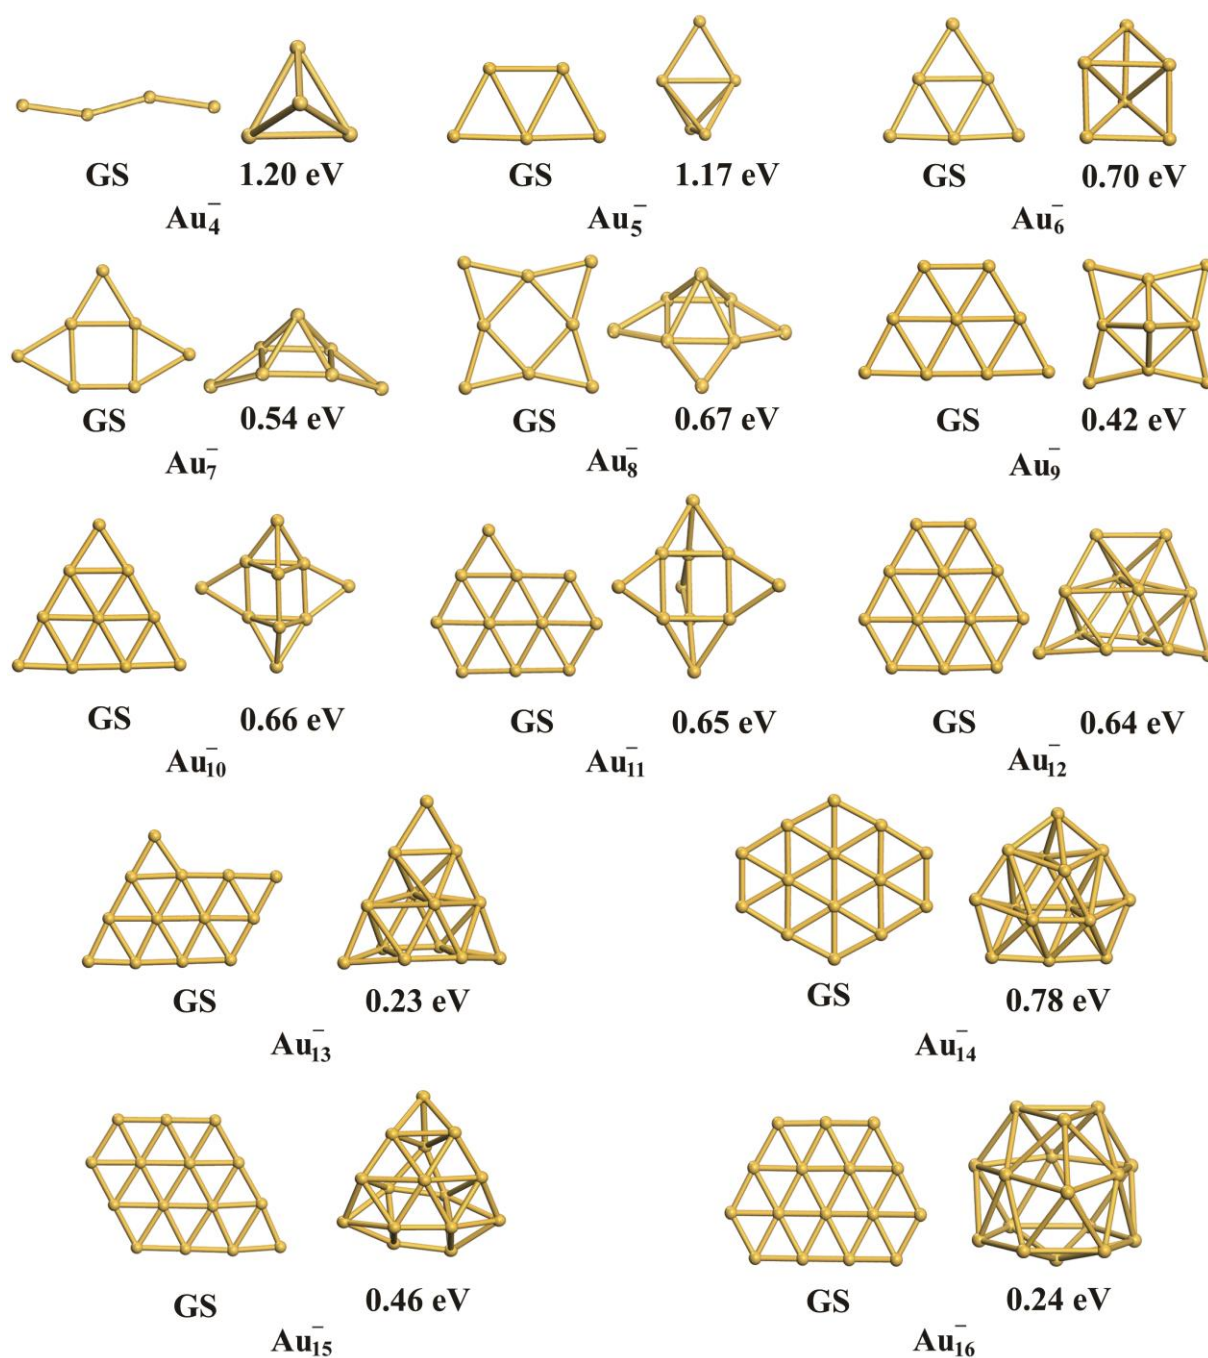

**Figure S1** The lowest energy 2D and 3D structures among the corresponding planar and non-planar structures studied by using PBE functional for  $\text{Au}_n^-$  anionic clusters, respectively. The GS stands for the ground state structure. The relative energy is provided below the corresponding isomer.

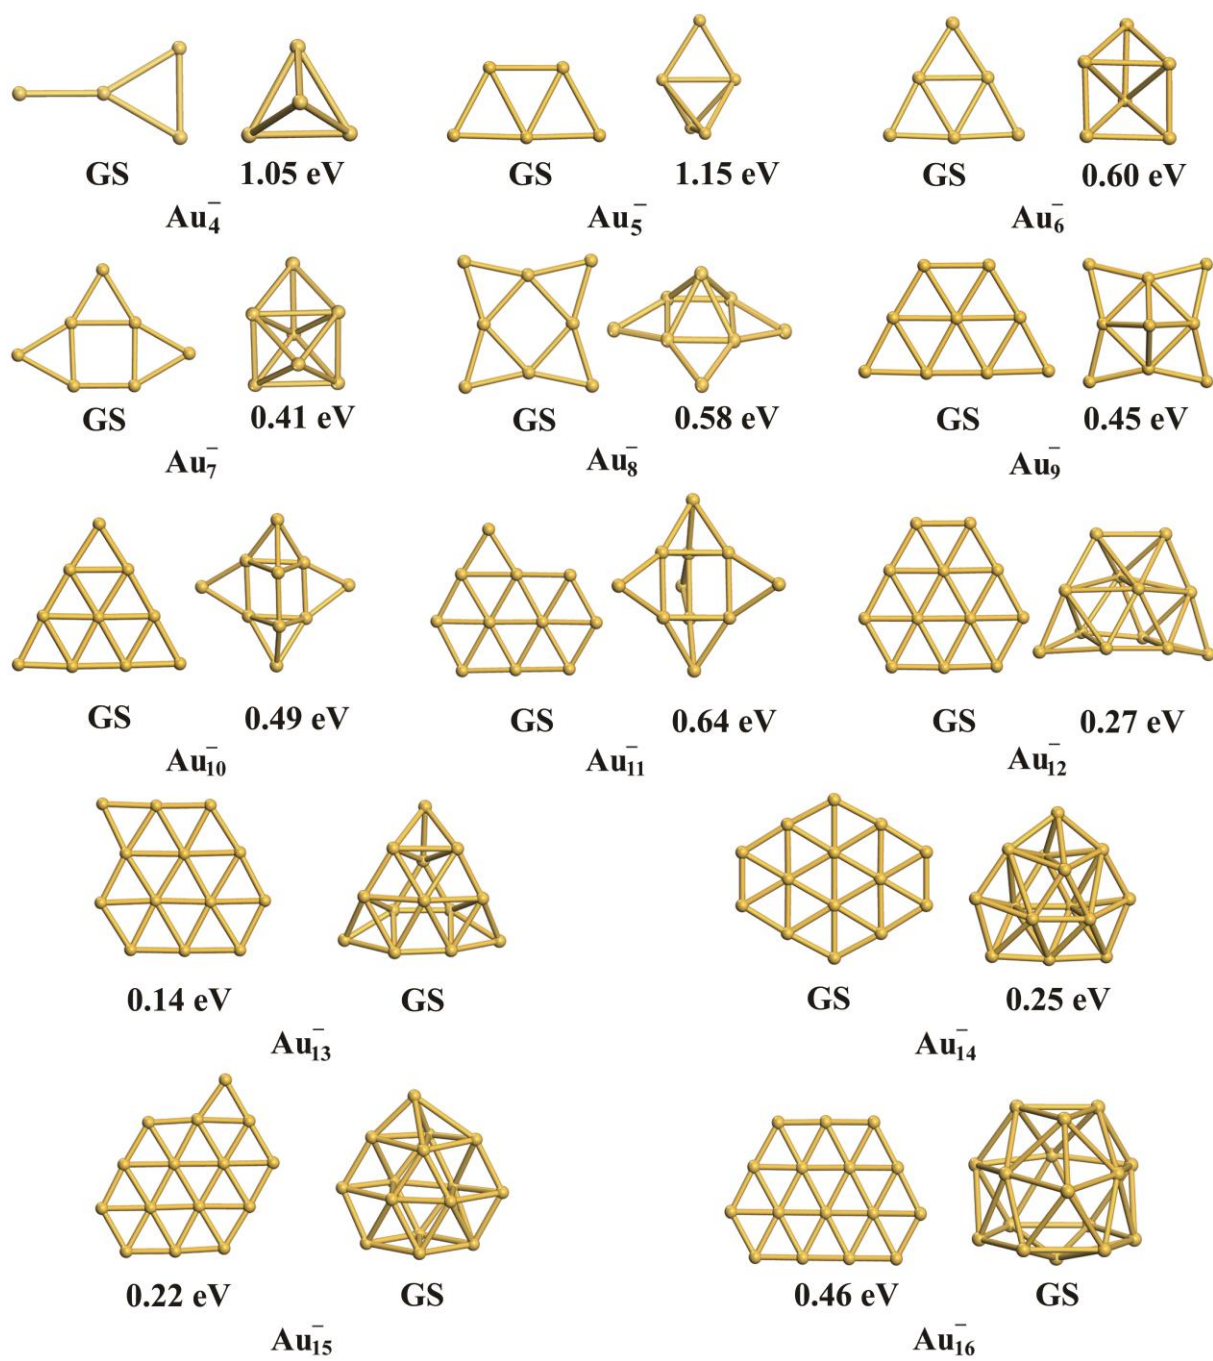

**Figure S2** Same as the caption of Fig. S1 except that the above results are calculated by using PBEsol functional.

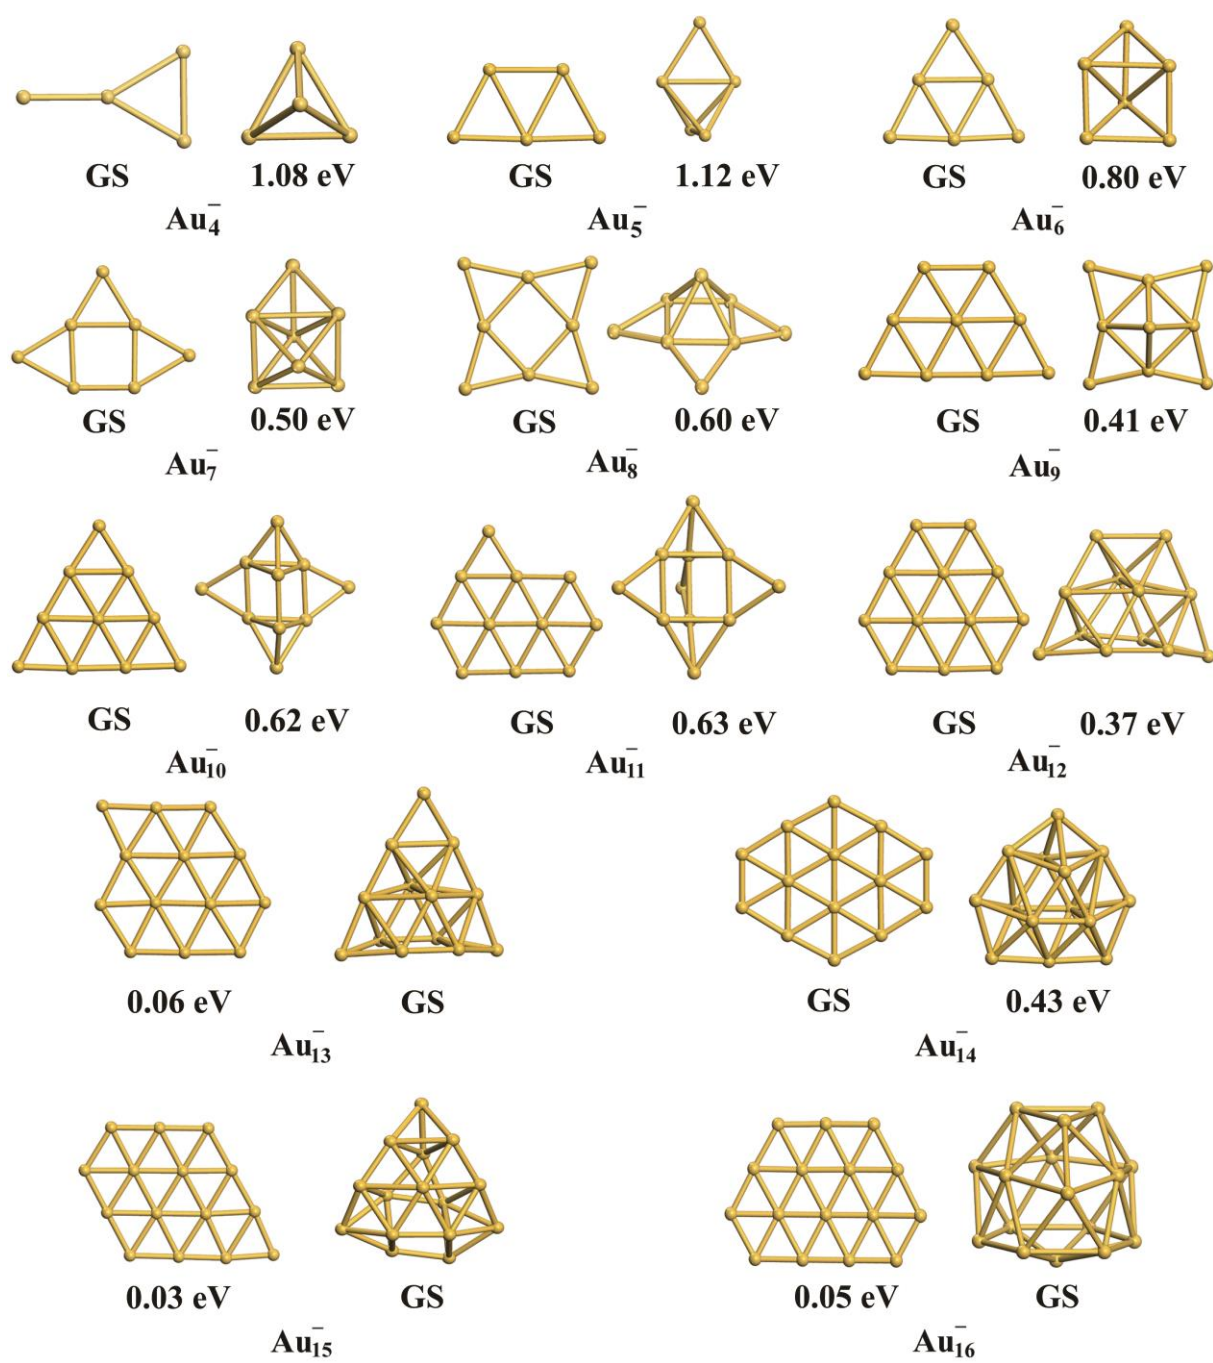

**Figure S3** Same as the caption of Fig. S1 except that the above results are calculated by using meta-GGA TPSS functional.



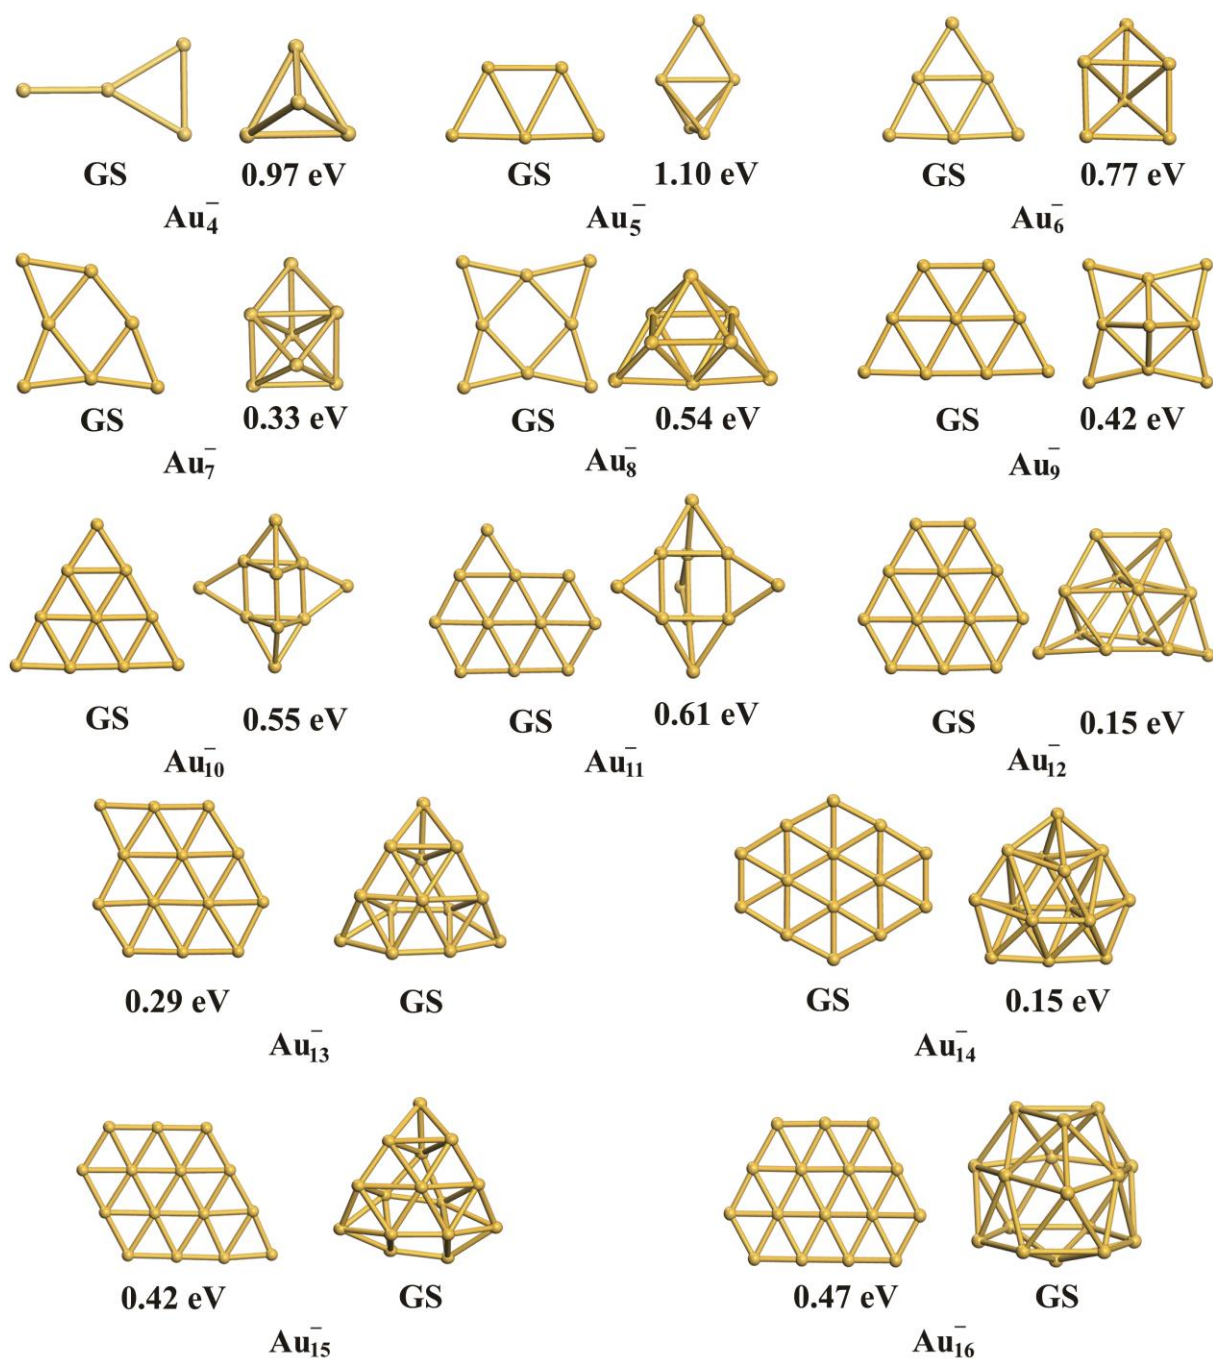

**Figure S4** Same as the caption of Fig. S1 except that the above results are calculated by using meta-GGA revTPSS functional.

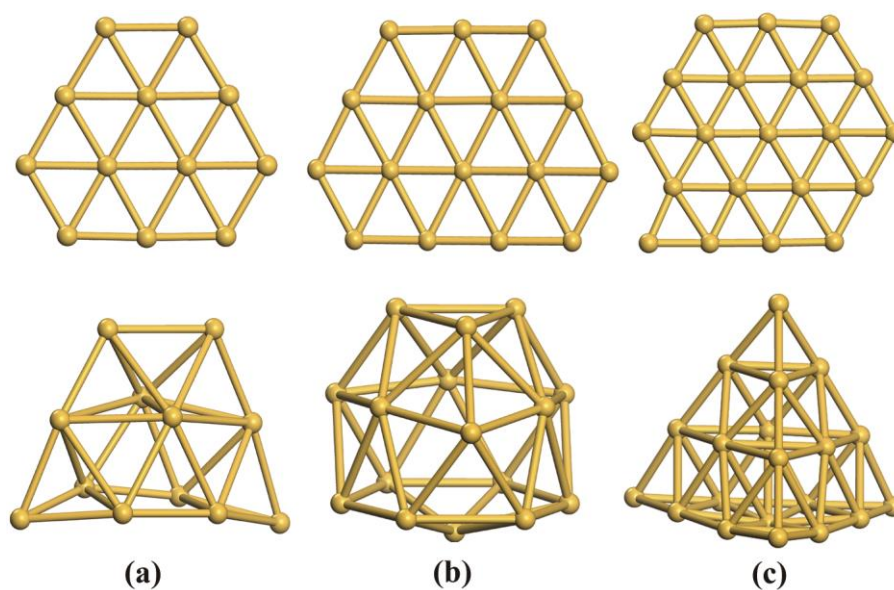

**Figure S5** The lowest energy 2D and 3D structures among the corresponding planar and non-planar structures for  $\text{Au}_{12}^-$ ,  $\text{Au}_{16}^-$ , and  $\text{Au}_{20}^-$  anionic clusters.

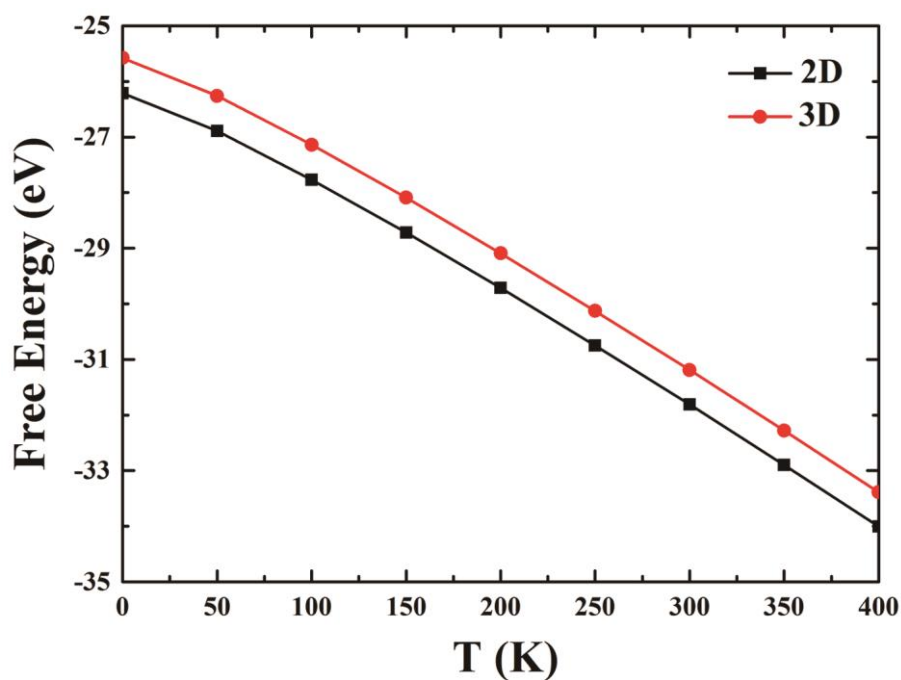

**Figure S6** The evolution of the calculated free energy as a function of temperature for the selected 3D geometry as shown in Fig. 2 as well as the corresponding 2D structure for  $\text{Au}_{12}^-$  cluster.

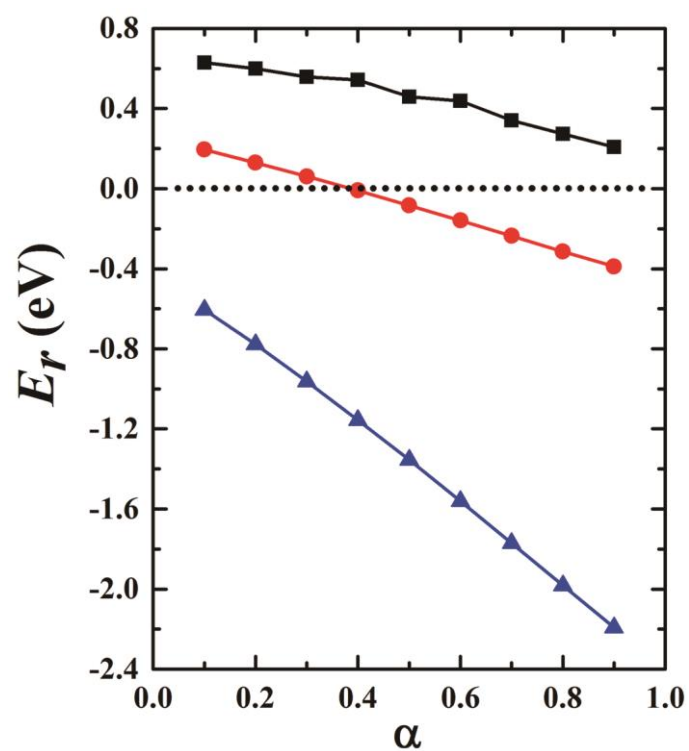

**Figure S7** The relative energy calculated with HSE functional versus the hybridization ratio  $\alpha$  of the 3D geometries as shown in Fig. 2 for the  $\text{Au}_{12}^-$ ,  $\text{Au}_{16}^-$ , and  $\text{Au}_{20}^-$  anionic clusters as referred to the corresponding 2D structures.

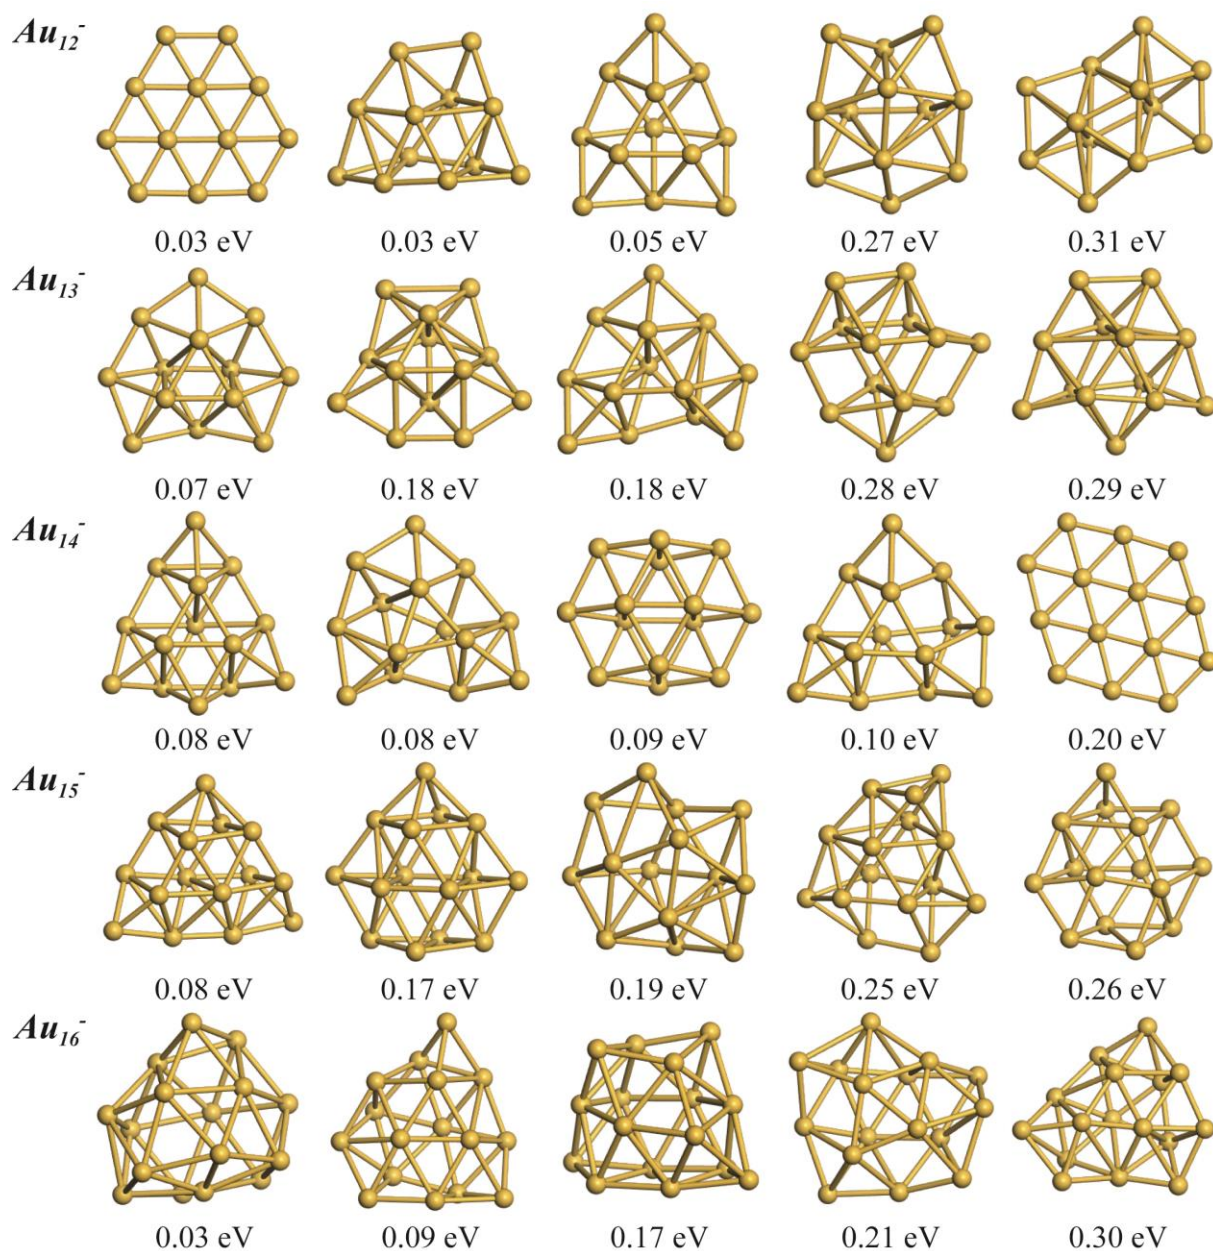

**Figure S8** The first 5 low-lying isomers for the  $Au_n^-$  ( $n \geq 12$ ) anions calculated by using the TSD-PBE method. The relative energy is provided below the corresponding isomer.



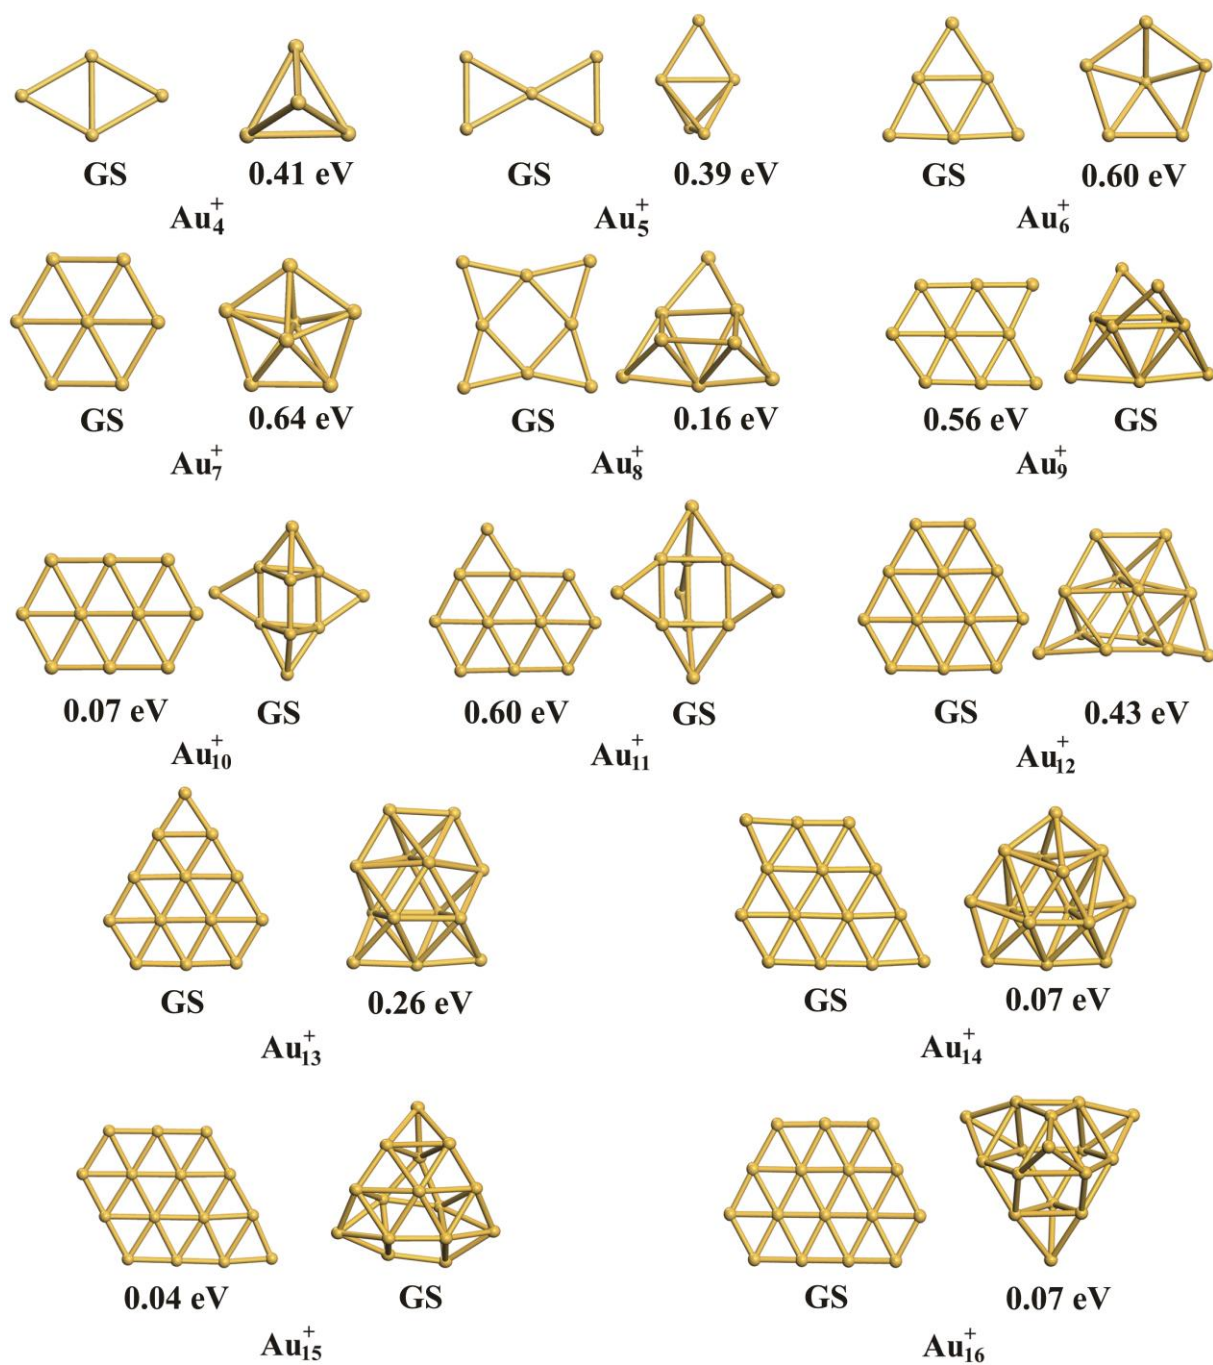

**Figure S9** The lowest energy 2D and 3D structures among the corresponding planar and non-planar structures studied by using PBE functional for Au<sub>n</sub><sup>+</sup> cationic clusters, respectively. The GS stands for the ground state structure. The relative energy is provided below the corresponding isomer.



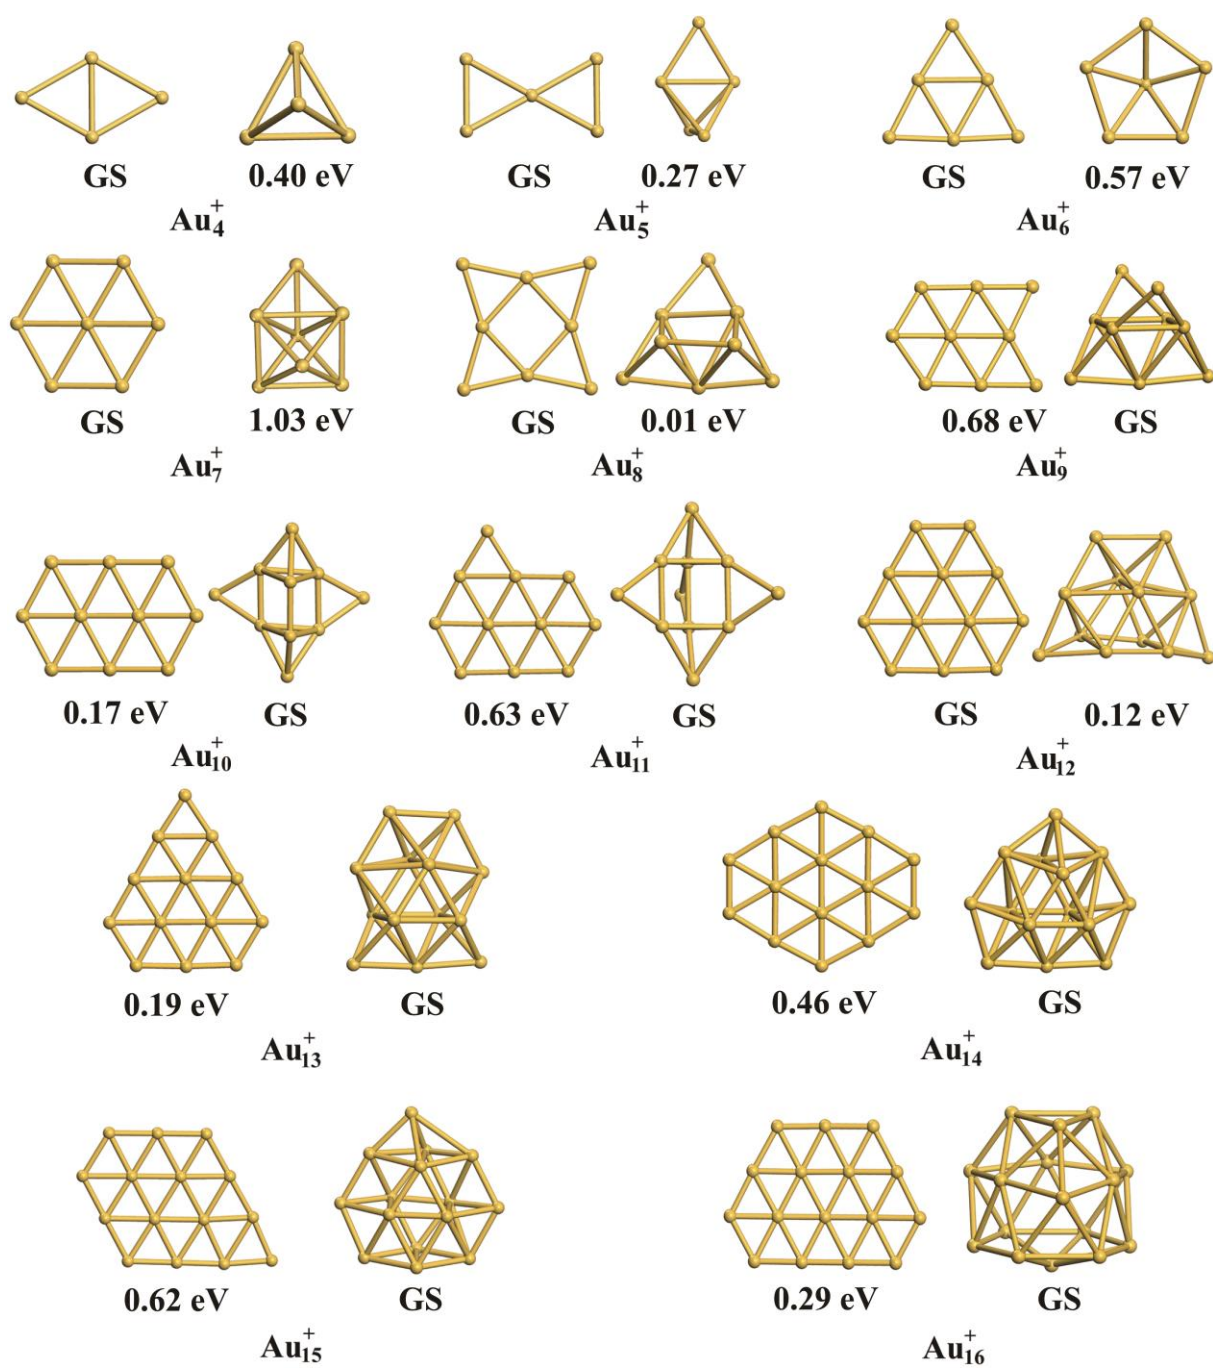

**Figure S10** Same as the caption of Fig. S9 except that the above results are calculated by using PBEsol functional.

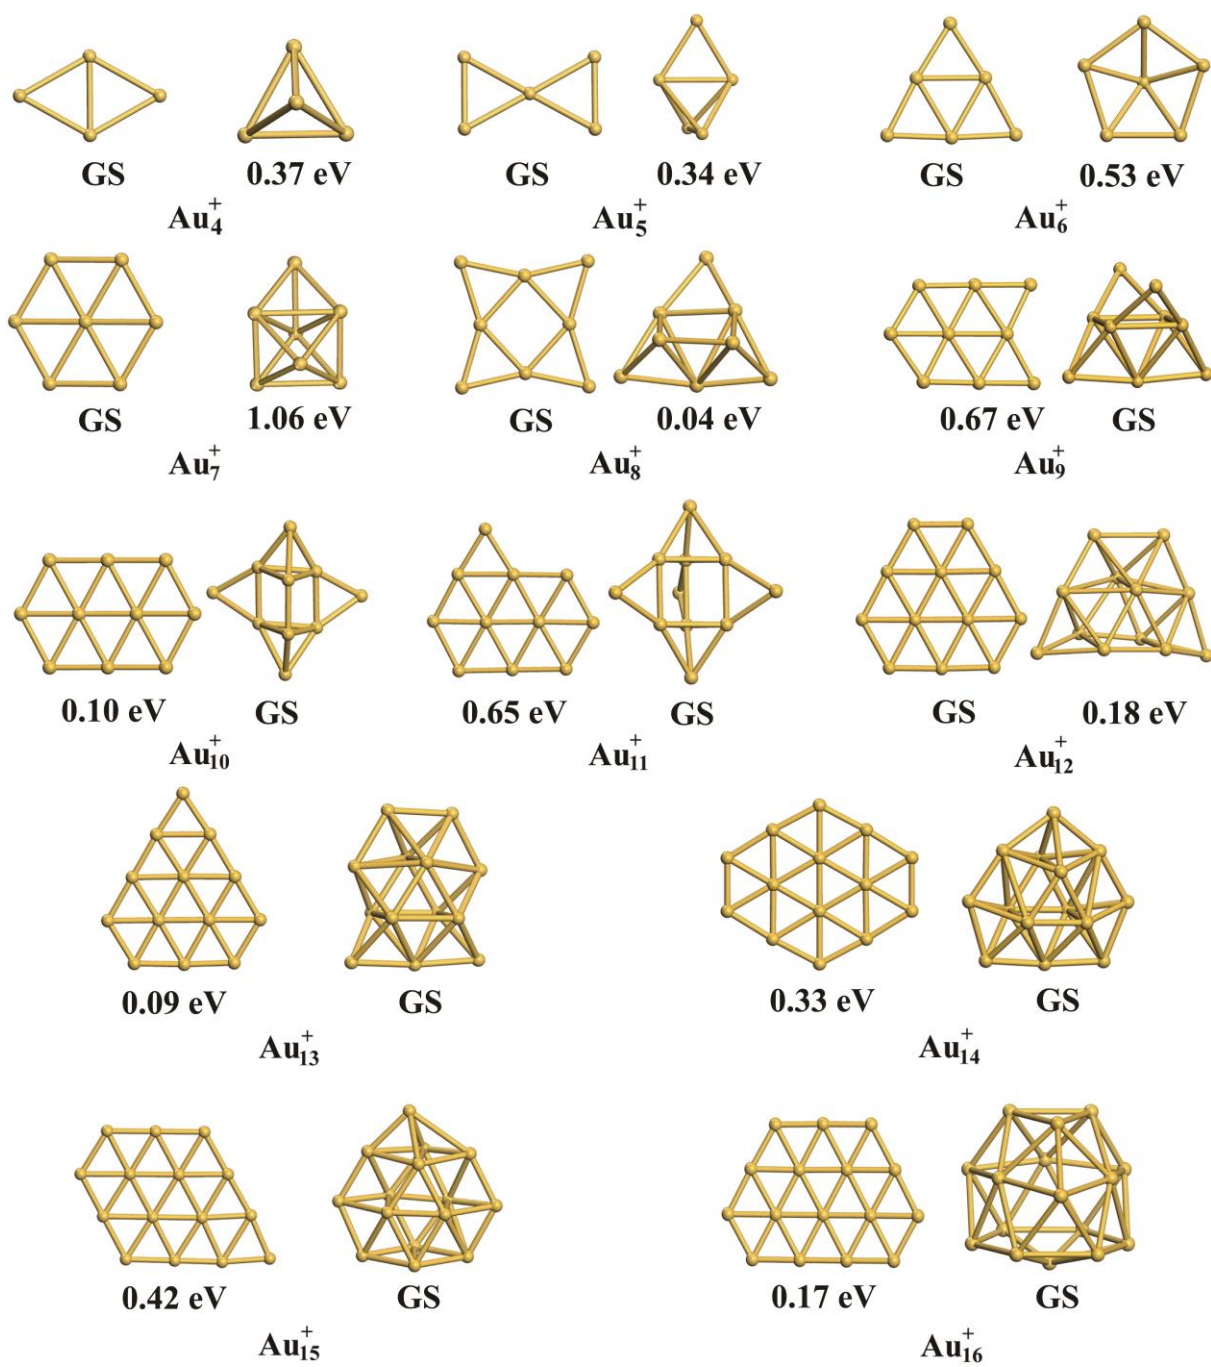

**Figure S11** Same as the caption of Fig. S9 except that the above results are calculated by using meta-GGA TPSS functional.

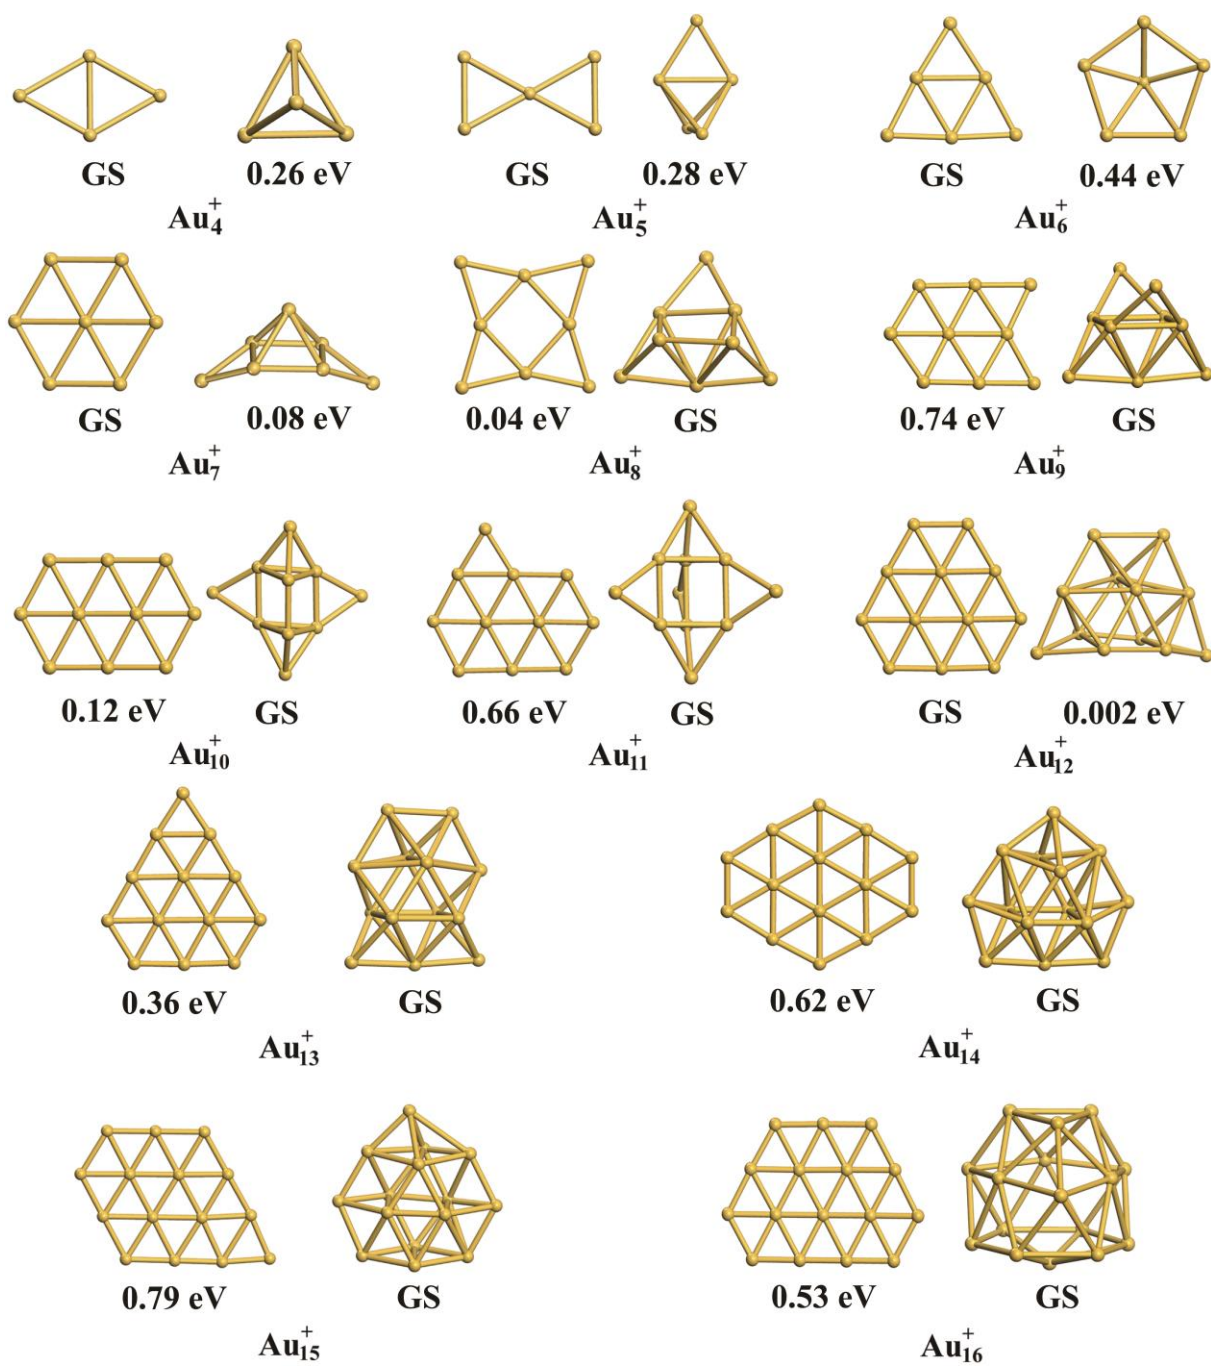

**Figure S12** Same as the caption of Fig. S9 except that the above results are calculated by using meta-GGA revTPSS functional.



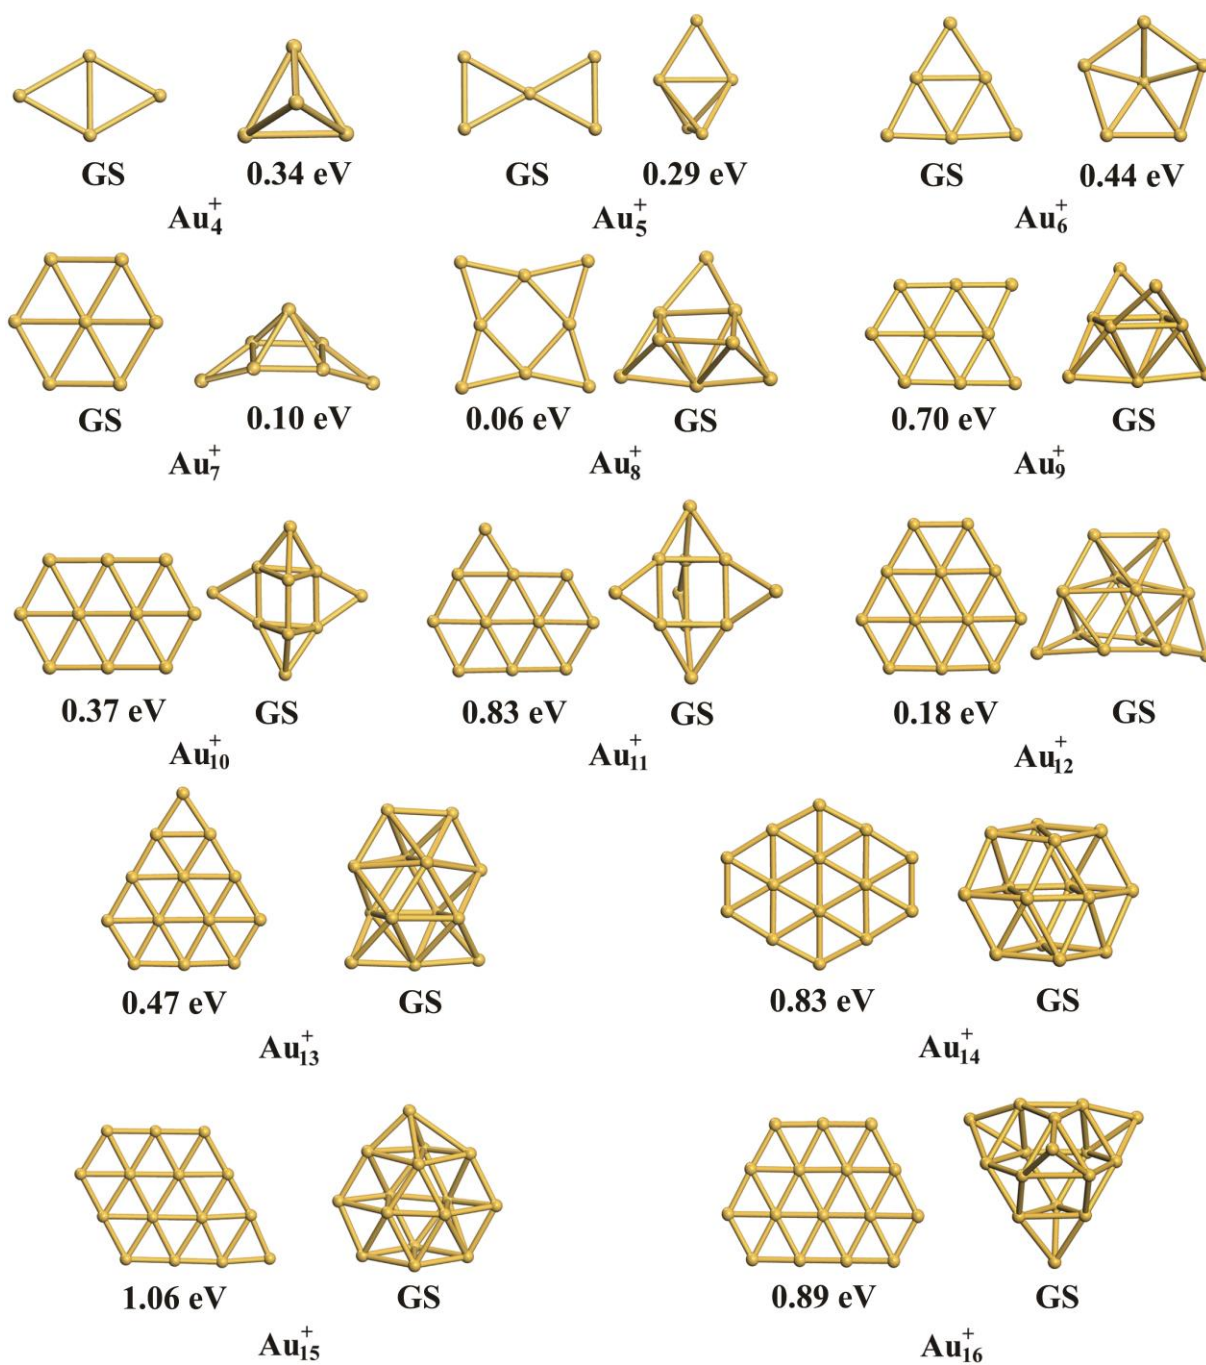

**Figure S13** Same as the caption of Fig. S9 except that the above results are calculated by using TSD-PBE method.



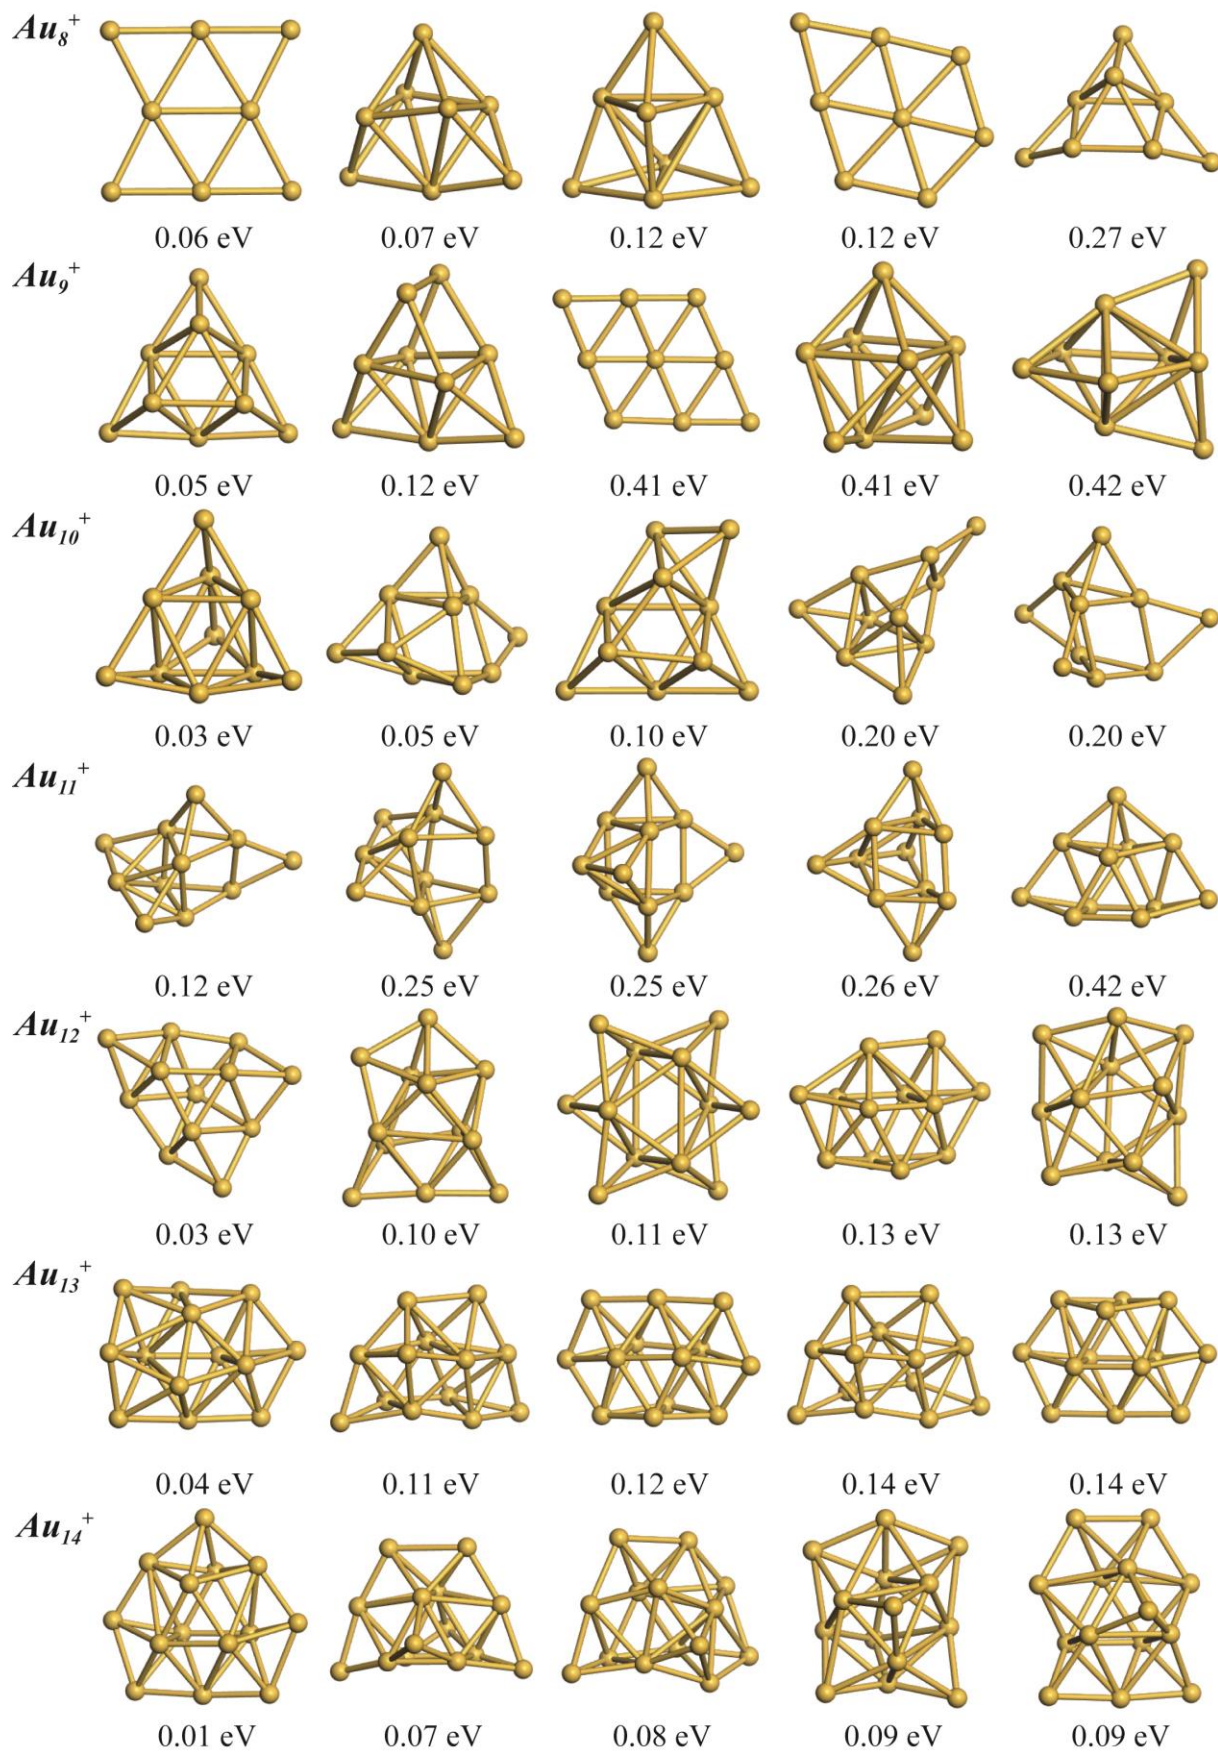

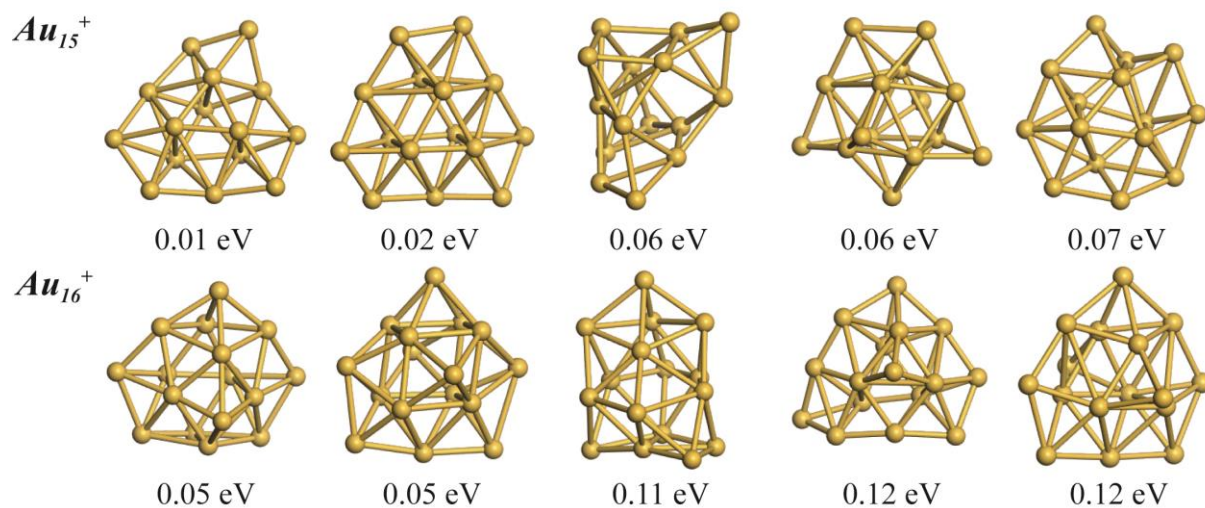

**Figure S14** The first 5 low-lying isomers for the  $Au_n^+$  ( $n \geq 8$ ) anions calculated by using the TSD-PBE method. The relative energy is provided below the corresponding isomer.

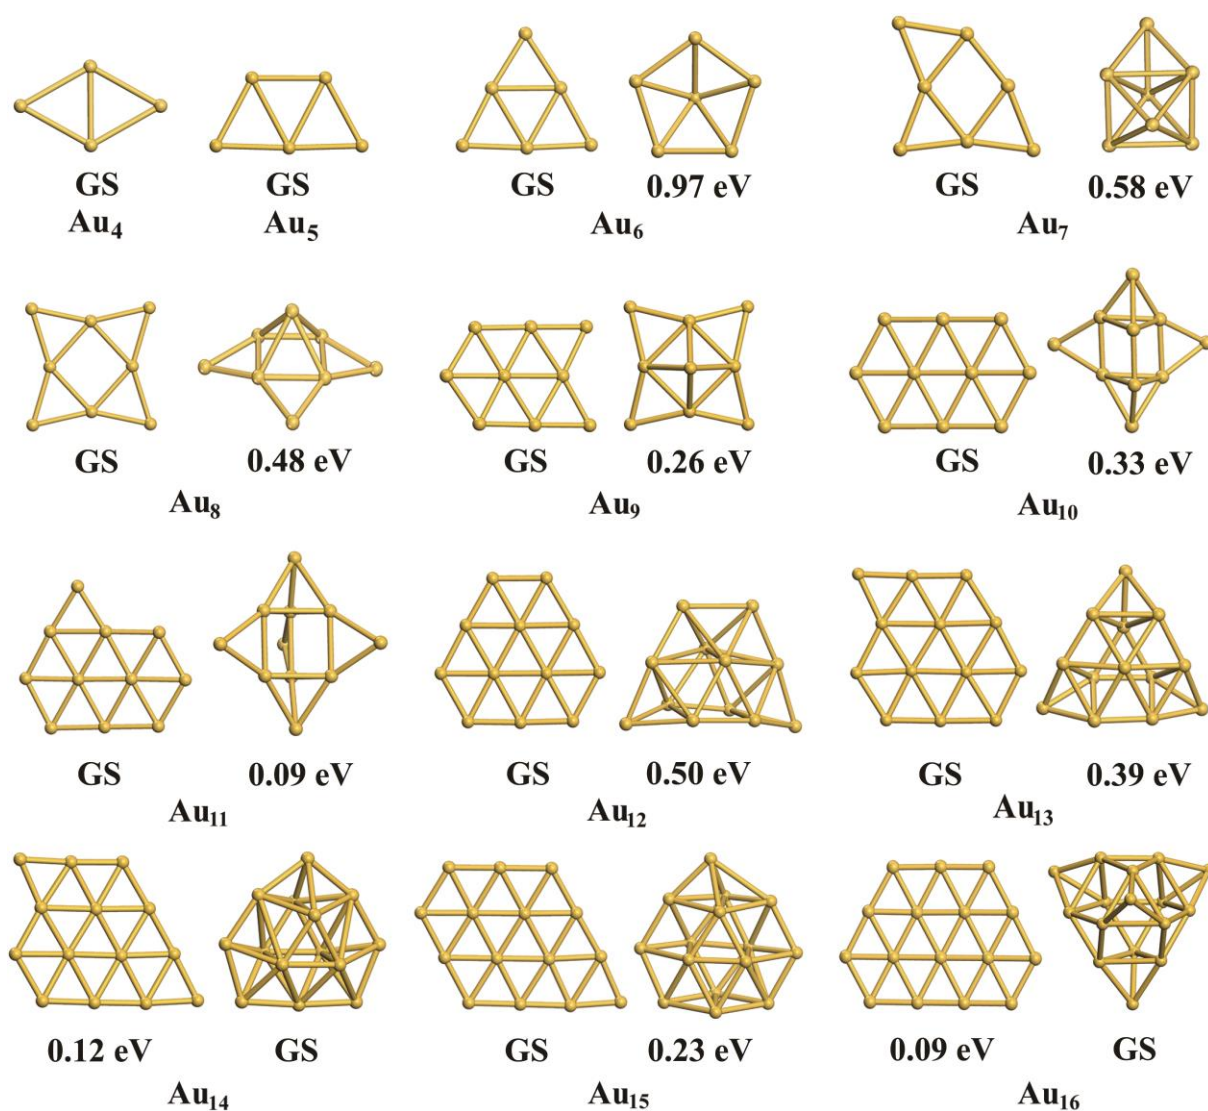

**Figure S15** The lowest energy 2D and 3D structures among the corresponding planar and non-planar structures studied by using PBE functional for Au<sub>n</sub> neutral clusters, respectively. No 3D compact structures were found in our studies for the Au<sub>4</sub> and Au<sub>5</sub> clusters. The GS stands for the ground state structure. The relative energy is provided below the corresponding isomer.



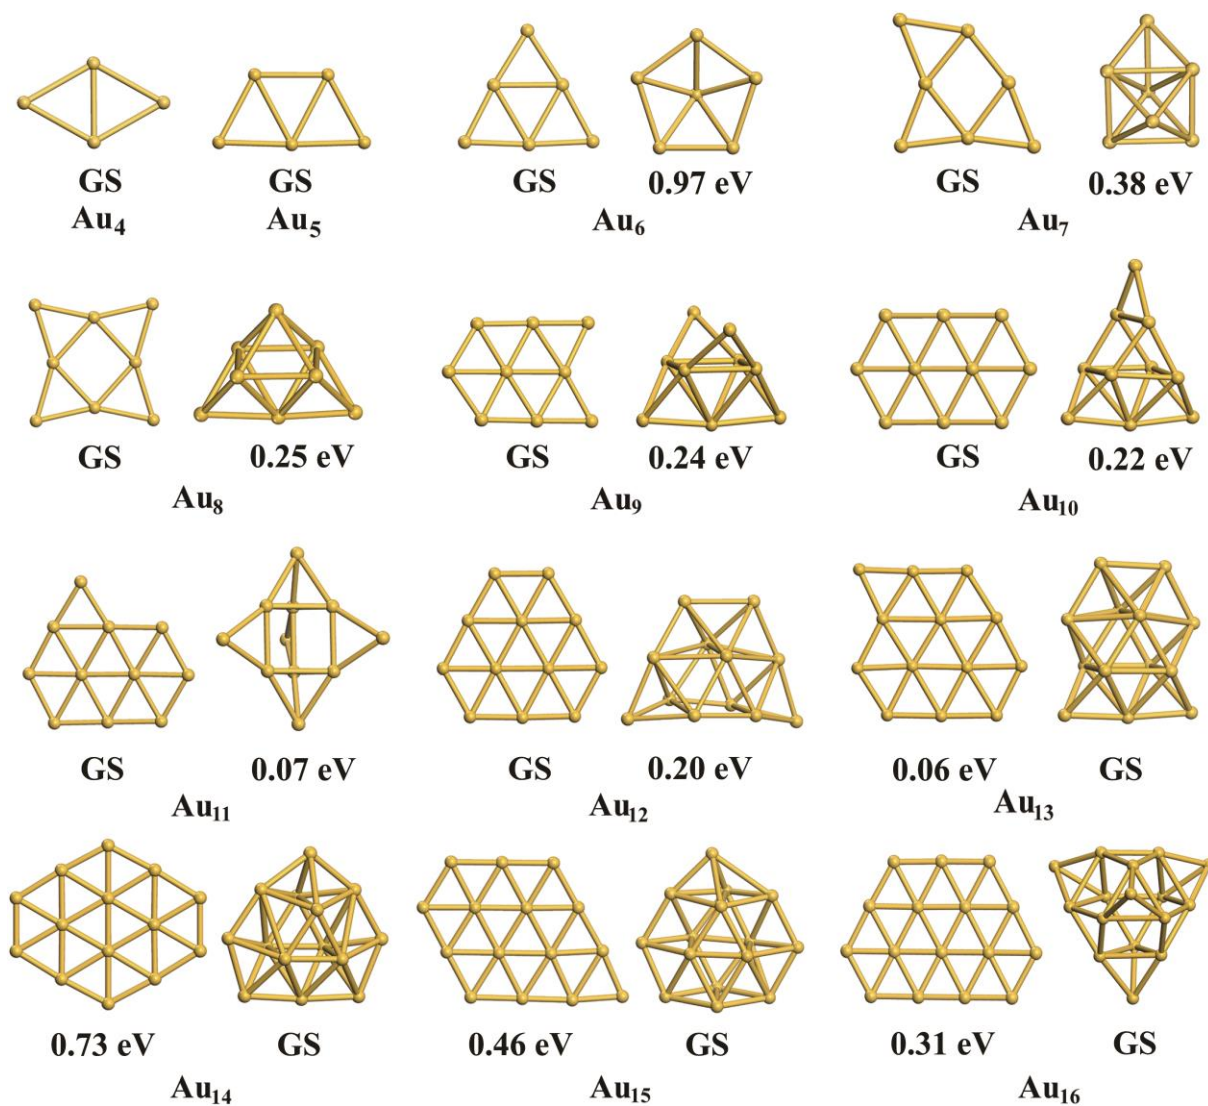

**Figure S16** Same as the caption of Fig. S15 except that the above results are calculated by PBEsol functional.



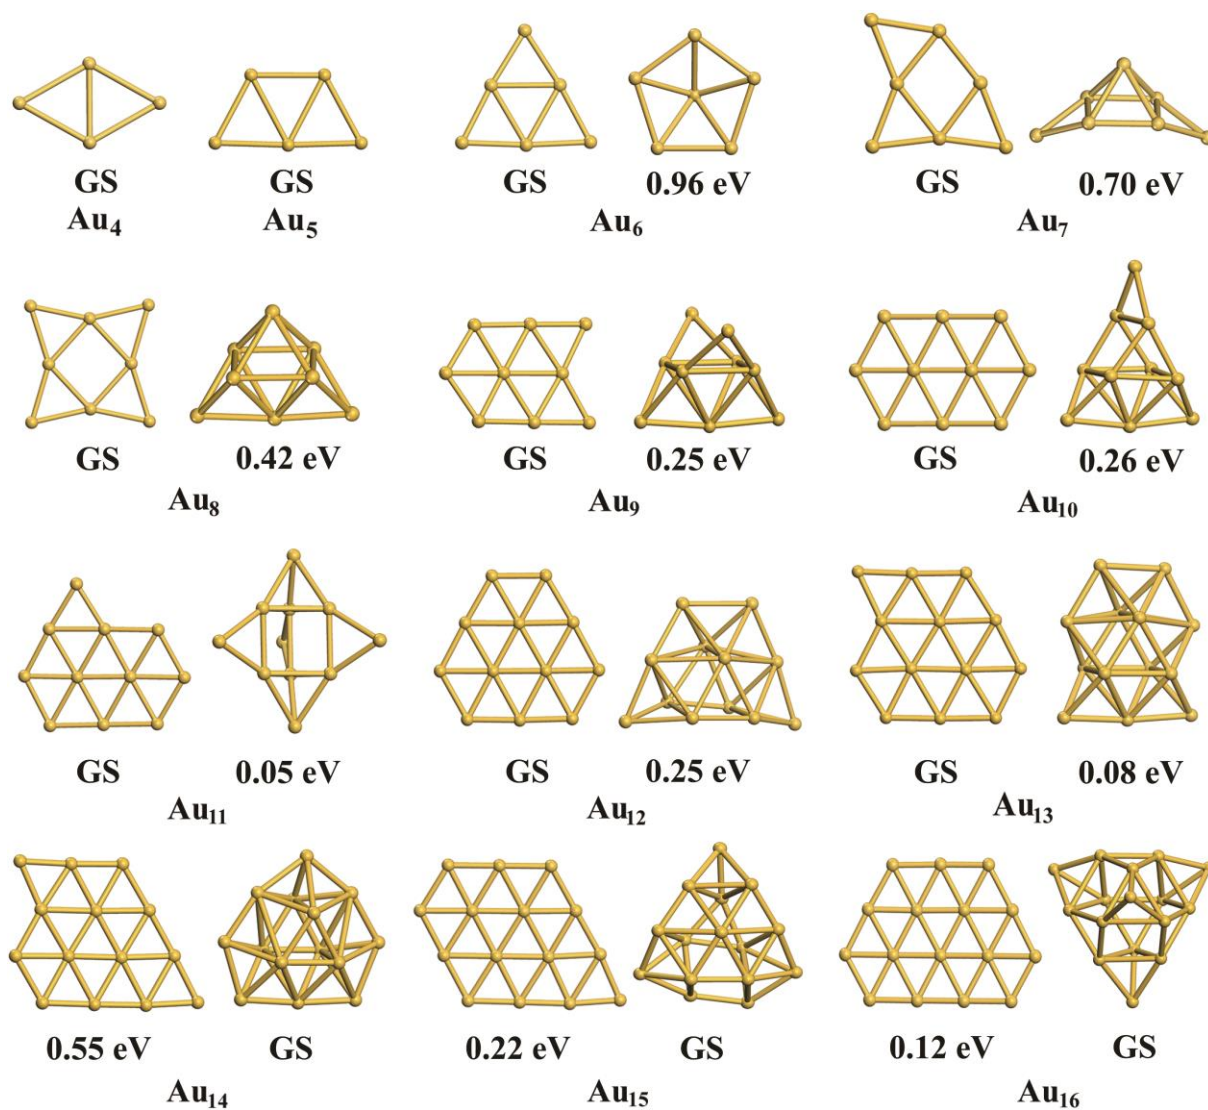

**Figure S17** Same as the caption of Fig. S15 except that the above results are calculated by using meta-GGA TPSS functional.

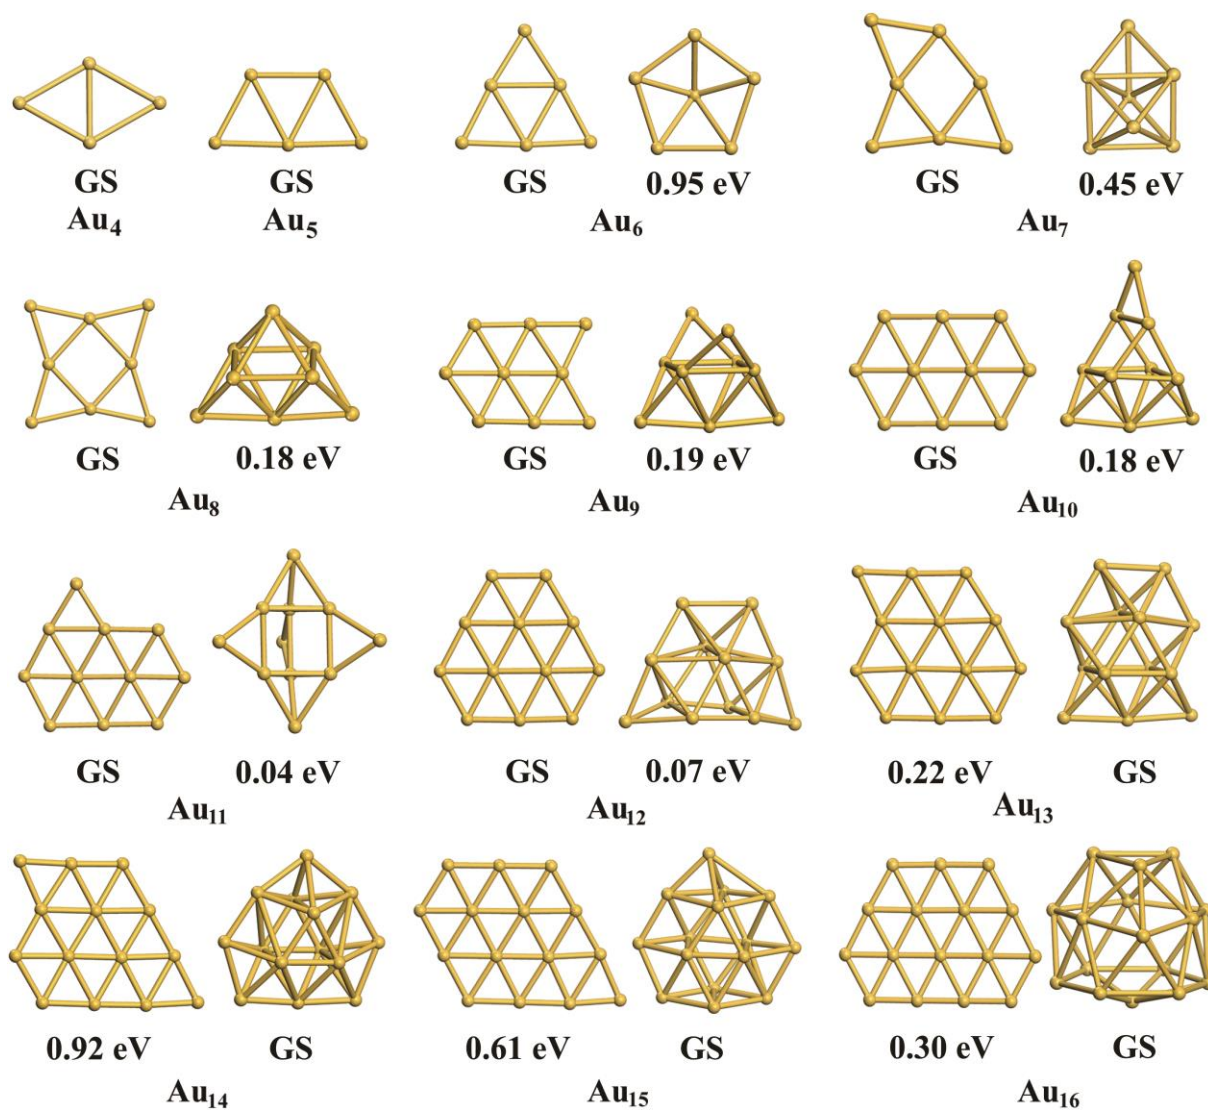

**Figure S18** Same as the caption of Fig. S15 except that the above results are calculated by using meta-GGA revTPSS functional.

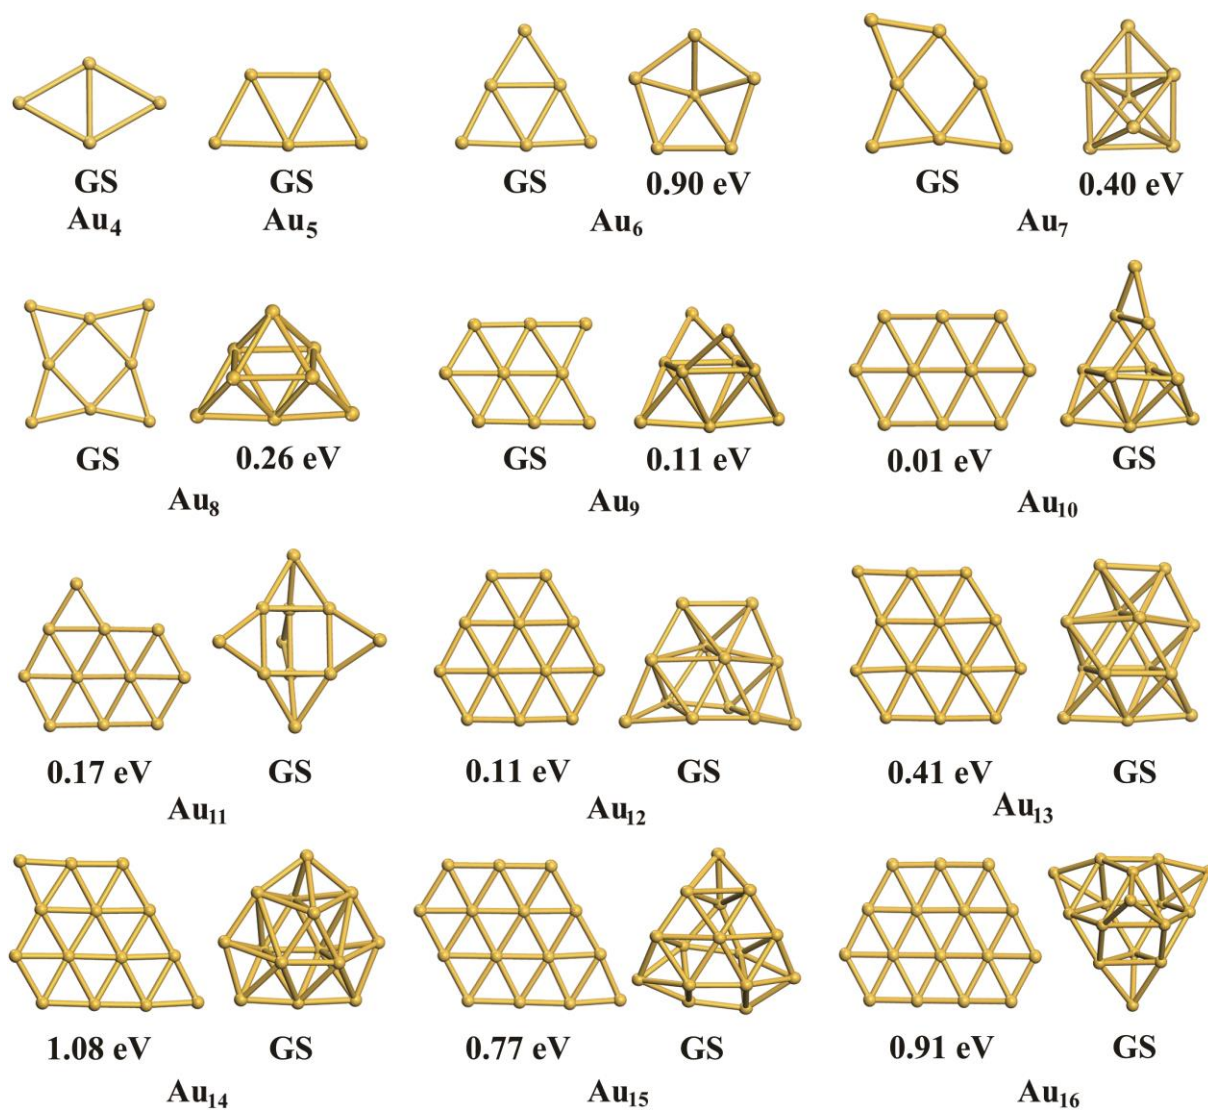

**Figure S19** Same as the caption of Fig. S15 except that the above results are calculated by using TSD-PBE method.



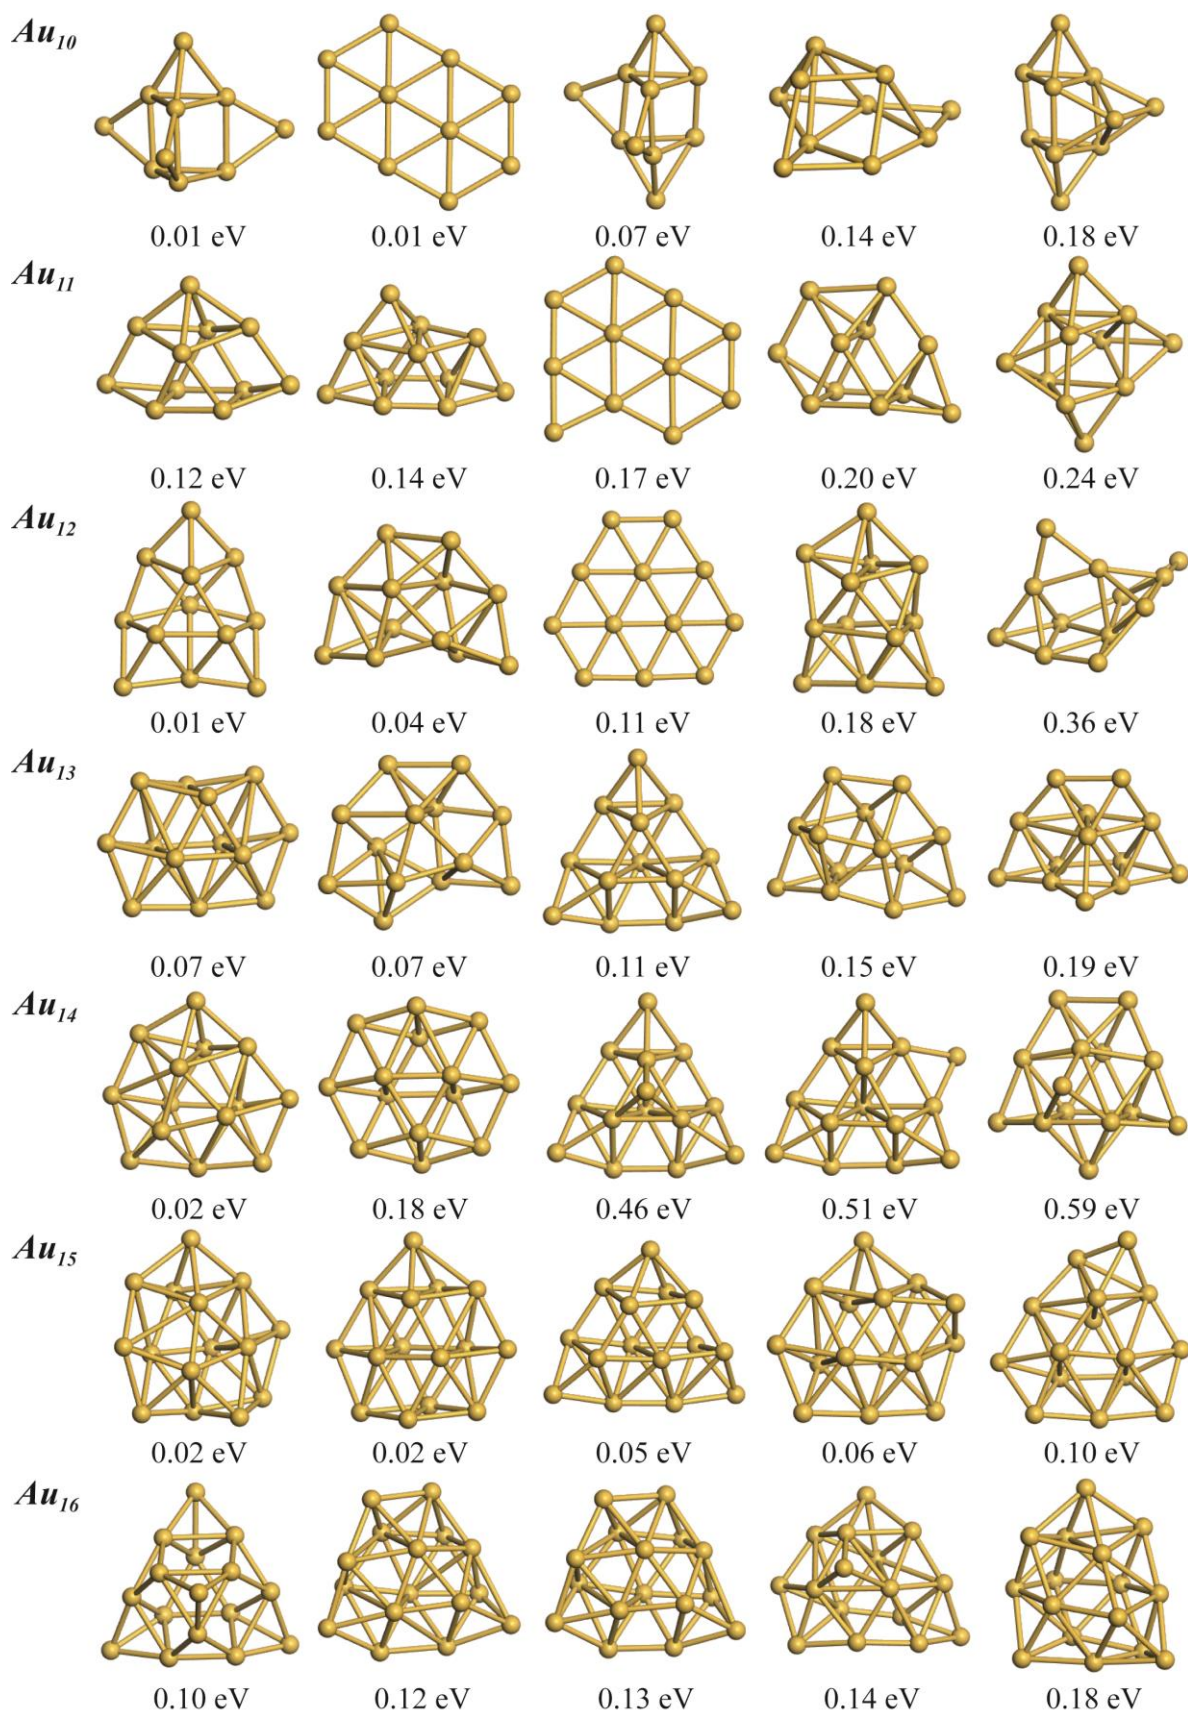

**Figure S20** The first 5 low-lying isomers for the  $Au_n$  ( $n \geq 10$ ) calculated by using the TSD-PBE method. The relative energy is provided below the corresponding isomer.
